# Supplementary material for: Sequence-independent characterization of viruses based on the pattern of viral small RNAs produced by the host
Source: PubMed Central journal article supplement (PMC4513865; doi:10.1093/nar/gkv587), 2015-06-03
Supplement: supp_gkv587_nar-00840-z-2015-File009.pdf [file supp_gkv587_nar-00840-z-2015-File009.pdf]

## SUPPLEMENTARY DATA

### Sequence-independent characterization of viruses based on the pattern of viral small RNAs produced by the host

Eric Roberto Guimaraes Rocha Aguiar<sup>1,2</sup>, Roenick Proveti Olmo<sup>1,2</sup>, Simona Paro<sup>2</sup>, Flavia Viana Ferreira<sup>3</sup>, Isaque João da Silva de Faria<sup>1</sup>, Yaovi Mathias Honore Todjro<sup>1</sup>, Francisco Pereira Lobo<sup>4</sup>, Erna Geessien Kroon<sup>3</sup>, Carine Meignin<sup>2,5</sup>, Derek Gatherer<sup>6</sup>, Jean-Luc Imler<sup>2,5,7</sup>, Joao Trindade Marques<sup>1,\*</sup>

<sup>1</sup>Department of Biochemistry and Immunology, Instituto de Ciências Biológicas, Universidade Federal de Minas Gerais, Belo Horizonte, Minas Gerais, CEP 30270-901, Brazil

<sup>2</sup>CNRS-UPR9022, Institut de Biologie Moléculaire et Cellulaire, 67084 Strasbourg Cedex, France

<sup>3</sup>Department of Microbiology, Instituto de Ciências Biológicas, Universidade Federal de Minas Gerais, Belo Horizonte, Minas Gerais, CEP 30270-901, Brazil

<sup>4</sup>Laboratório Multiusuário de Bioinformática, Embrapa Informática Agropecuária, Campinas, São Paulo, CEP 13083-886, Brazil

<sup>5</sup>Faculté des Sciences de la Vie, Université de Strasbourg, 67083 Strasbourg Cedex, France

<sup>6</sup>Division of Biomedical and Life Sciences, Faculty of Health and Medicine, Lancaster University, Lancaster, Lancashire, LA1 4YQ, United Kingdom

<sup>7</sup>Institut d'Etudes Avancées de l'Université de Strasbourg (USIAS), 67084 Strasbourg Cedex, France

| <b>Contents</b>                                                                                                                                          | <b>Page</b> |
|----------------------------------------------------------------------------------------------------------------------------------------------------------|-------------|
| <b>Supplementary Methods</b>                                                                                                                             |             |
| Phylogenetic and Dinucleotide frequency analyses                                                                                                         | 2           |
| <b>Supplementary Tables</b>                                                                                                                              |             |
| Supplementary Table S1. Oligonucleotide primers used for PCR analysis                                                                                    | 3           |
| Supplementary Table S2. Overview of libraries analyzed in this study                                                                                     | 4           |
| Supplementary Table S3. Summary of viruses identified in published small RNA libraries                                                                   | 5           |
| Supplementary Table S4. Reference viral sequences used for phylogenetic and dinucleotide frequency analyses                                              | 6           |
| <b>Supplementary Figures</b>                                                                                                                             |             |
| Supplementary Figure S1. Virus-derived small RNA can be assembled into long contig sequences                                                             | 7           |
| Supplementary Figure S2. Unknown contigs classify small RNA libraries in a host-specific manner                                                          | 8           |
| Supplementary Figure S3. Viruses identified by small RNA sequencing belong to diverse viral families according to phylogenetic and dinucleotide analyses | 9           |
| Supplementary Figure S4. Small RNA size profile of representative contigs derived from Animalia, Bacteria and Fungi                                      | 11          |
| Supplementary Figure S5. Polymerase and capsid segments from HTV and DAV show similarity to different viral families                                     | 12          |
| Supplementary Figure S6. ORF organization and domain analysis of viral sequences identified by our strategy                                              | 13          |
| Supplementary Figure S7. Analysis of B2-like protein from LPNV                                                                                           | 14          |
| Supplementary Figure S8. ORF structure and small RNA profile of unknown viral sequences identified in small RNA libraries from U4.4 cells                | 15          |
| <b>Supplementary References</b>                                                                                                                          | 16          |

## **SUPPLEMENTARY METHODS**

**Phylogenetic and dinucleotide frequency analyses.** Nucleotide or protein sequences were chosen based on BLAST similarity and were aligned using Muscle (62), implemented in MEGA (63). The best substitution model was estimated using maximum likelihood (ML) methods, and ML trees constructed using 100 bootstrap replicates. The consensus trees were midpoint–rooted. Where the bootstrap confidence of a node exceeded 70%, the bootstrap values are indicated on the trees. Nucleotide sequence ML trees were drawn in MEGA using the Tamura 3-parameter substitution model (T92+I) (64). Protein sequence ML trees were drawn in MEGA using the Poisson substitution model (in one case, the WAG substitution model was used as indicated) (65,66). Dinucleotide frequency analysis in each contig or reference sequence was calculated and results clustered based on Spearman’s rho correlation to build dendograms essentially as described (67). Organism list, acronyms and identifiers for each database are shown in **Supplementary Table S4**.

**Supplementary Table S1.** Oligonucleotide primers used for PCR analysis.

| Target                | Tm (°C) | Forward              | Reverse              |
|-----------------------|---------|----------------------|----------------------|
| <b>Viruses</b>        |         |                      |                      |
| PCLV                  | 55      | CTATTATTGGCACCCCTGAA | CCAGATCCTAGCATTGGTTT |
| HTV                   | 55      | GTATACGCGTTGGTGAGTAT | CCGACTCAGCATAATTACGA |
| Aae.92                | 55      | GTCTGATTTGCCCAACTCTA | CAGCATCGCAGGTTATAGTA |
| LPRV1                 | 55      | CCATGATCCAGCAATTCAAC | GTGCACACATATCATAAGCG |
| LPRV2                 | 55      | CTGGAAGATCAATGGTGTGA | TAATGGCGATGGACGATAAG |
| LPNV                  | 55      | GTGTTAATTGTGTGCGTTCC | GGTGACTCAATCAATGAACG |
| DUV                   | 55      | GAACTATCGCACCGTTTAAC | GTTGTGTCGTGTCTAGAAGT |
| DRV                   | 55      | GTGTGGTCTACATGTCAAGT | GGTAACAGCGTGACCATAT  |
| <b>LPRV1 Segments</b> |         |                      |                      |
| 3330/3331             | 55      | ACACGTCGTTAATACCTCAG | GTTGTGAAGTAACTGGCAAC |
| 3332/3333             | 55      | AAGTAAACCCAGACCACATC | GTGTAGAGTATATGCGTGCA |
| 3310/3311             | 55      | ATTCCAGTCAGCGTAAAGTT | AGGTGTGATGGCATTGTAAT |
| 3312/3313             | 55      | TAATAGTTGTAGCCATGGCC | TCTCCACAGAGCAATCAATC |
| <b>LPRV2 Segments</b> |         |                      |                      |
| 3336/3337             | 55      | TGCTACTCTAGTTCTCGTCA | CCATCTAAGTGTCAGCGTTA |
| 3338/3339             | 55      | AATATAGCCTATGCGACGAC | ACCACATGTATAATCGACGG |
| 3314/3315             | 55      | TTCCTGACGGGTAGACATAT | GAGTGCAAGCATATGACAAC |
| 3318/3319             | 55      | GGTATAACACGGTTTCCTGT | TACTACACTGCGGCTAGTT  |
| 3316/3317             | 55      | CATGCAAGGAACATGATGTC | TATGTCAATGTGCGCATCTA |

**Supplementary Table S2.** Overview of RNA libraries analyzed in this study.

| Library                                  | Number of pooled individuals | SRA ID     | Artificial infection | Total number of reads | Number of mapped reads on host | Number of processed reads | Number of contigs | N50 (nt) | Size of largest contig (nt) | Number of contigs hit virus |
|------------------------------------------|------------------------------|------------|----------------------|-----------------------|--------------------------------|---------------------------|-------------------|----------|-----------------------------|-----------------------------|
| <b>Libraries sequenced in this study</b> |                              |            |                      |                       |                                |                           |                   |          |                             |                             |
| <i>Drosophila melanogaster</i>           |                              |            |                      |                       |                                |                           |                   |          |                             |                             |
| Dme_1                                    | 6                            | SRR1803381 | SINV                 | 4,234,079             | 3,194,745                      | 596,761                   | 327               | 79       | 4,765                       | 41                          |
| Dme_2                                    | 6                            | SRR1803382 | DCV                  | 15,786,440            | 11,483,909                     | 2,018,666                 | 343               | 137      | 3,496                       | 5                           |
| Dme_3                                    | 6                            | SRR1803383 | VSV                  | 24,474,261            | 21,701,073                     | 1,039,581                 | 171               | 288      | 3,482                       | 37                          |
| <i>Aedes aegypti</i> – small RNA         |                              |            |                      |                       |                                |                           |                   |          |                             |                             |
| Aae_1                                    | 6                            | SRR1803377 | none                 | 9,081,151             | 8,076,206                      | 891,983                   | 1,686             | 67       | 2,301                       | 16                          |
| Aae_2                                    | 6                            | SRR1803378 | none                 | 12,183,902            | 10,827,108                     | 999,843                   | 1,658             | 66       | 1,611                       | 17                          |
| Aae_3                                    | 6                            | SRR1803379 | none                 | 9,253,941             | 8,010,814                      | 1,158,379                 | 2,722             | 68       | 5,122                       | 12                          |
| <i>Aedes aegypti</i> – Long RNA          |                              |            |                      |                       |                                |                           |                   |          |                             |                             |
| Aae_1                                    | 6                            | SRR1813817 | none                 | 39,488,681            | 35,767,399                     | 3,721,282                 | 295,760           | 136      | 2,070                       | 12                          |
| Aae_2                                    | 6                            | SRR1813823 | none                 | 57,584,234            | 52,130,913                     | 5,453,321                 | 358,323           | 136      | 1,988                       | 17                          |
| Aae_3                                    | 6                            | SRR1813824 | none                 | 62,302,651            | 56,383,441                     | 5,919,210                 | 357,264           | 138      | 2,334                       | 9                           |
| <i>Lutzomyia longipalpis</i>             |                              |            |                      |                       |                                |                           |                   |          |                             |                             |
| Llo_1                                    | 8                            | SRR1803384 | none                 | 12,297,884            | 10,852,586                     | 483,139                   | 1,207             | 69       | 1,345                       | 14                          |
| Llo_2                                    | 7                            | SRR1803385 | none                 | 9,463,241             | 8,162,975                      | 449,4327                  | 2,151             | 63       | 980                         | 12                          |
| Llo_3                                    | 7                            | SRR1803386 | none                 | 8,109,613             | 7,285,842                      | 659,215                   | 1,541             | 78       | 1,113                       | 31                          |
| <b>Published small RNA libraries</b>     |                              |            |                      |                       |                                |                           |                   |          |                             |                             |
| U4.4 cells                               | -                            | SRR389184  | SINV-GFP             | 27,997,328            | 20,467,497                     | 6,689,669                 | 1,086             | 72       | 1,273                       | 95                          |
| Aag2 cells                               | -                            | SRR389187  | SINV-GFP             | 35,569,242            | 21,247,368                     | 9,316,546                 | 763               | 87       | 1,874                       | 79                          |
| Mosquitoes                               | -                            | SRR400496  | SINV                 | 4,238,851             | 2,980,359                      | 1,300,122                 | 226               | 197      | 7,361                       | 9                           |
| Mosquitoes                               | -                            | SRR400497  | SINV-NoVB2           | 3,522,010             | 2,874,099                      | 689,541                   | 219               | 74       | 201                         | 67                          |
| <i>Arabidopsis</i> leaves                | -                            | SRR1561607 | TuMV                 | 15,841,206            | 6,269,276                      | 6,532,498                 | 75                | 2,896    | 7,706                       | 2                           |
| Grouper GP cells                         | -                            | SRR096455  | SGIV                 | 7,246,099             | 4,742,849                      | 936,104                   | 147               | 64       | 154                         | 22                          |
| Mouse lungs                              | -                            | SRX377856  | SARS-CoV             | 44,436,105            | 37,200,539                     | 6,835,566                 | 528,894           | 36       | 291                         | 0                           |
| Mouse lungs                              | -                            | SRR452408  | SARS-CoV             | 22,665,163            | 16,979,135                     | 2,914,479                 | 924               | 66       | 429                         | 140                         |
| Mouse lungs                              | -                            | SRR452409  | none                 | 24,311,834            | 17,067,263                     | 3,123,142                 | 757               | 57       | 212                         | 0                           |
| Mouse ES cells                           | -                            | SRR640604  | EMCV                 | 64,913,697            | 34,379,621                     | 13,995,769                | 898               | 62       | 255                         | 69                          |
| Mouse ES cells                           | -                            | SRR640602  | none                 | 56,784,360            | 33,088,484                     | 12,742,698                | 867               | 61       | 293                         | 0                           |

**Supplementary Table S3.** Summary of viruses identified in published small RNA libraries.

| SRA ID/sample                                                      | Virus family          | Virus                                                | Origin of viral sequence | Strategy      | Largest contig size (nt) | Number of hits | Best hit                                      | E-value   | Accession number |
|--------------------------------------------------------------------|-----------------------|------------------------------------------------------|--------------------------|---------------|--------------------------|----------------|-----------------------------------------------|-----------|------------------|
| <b>SRR389184/</b><br><b>Aedes albopictus U4.4 cells + SINV-GFP</b> | <i>Togaviridae</i>    | <i>Sindbis virus</i>                                 | experimental infection   | blastx        | 1,128                    | 38             | nonstructural polyprotein [Sindbis virus]     | 0.0       | AAA96975.1       |
|                                                                    | <i>Iridoviridae</i>   | <i>Insect iridescent virus-6</i>                     | unknown                  | blastx        | 73                       | 1              | IIV6 genome                                   | 1,00E-07  | AF303741.1       |
|                                                                    | <i>Birnaviridae</i>   | <i>Mosquitoe X virus</i>                             | unknown                  | blastx        | 195                      | 54             | polyprotein [Mosquitoe x virus]               | 4,00E-39  | AFU34333.1       |
|                                                                    | unknown               | Unknown (contig U4.4.84)                             | unknown                  | pattern-based | 390                      | 1              | -                                             | -         | -                |
|                                                                    | unknown               | Unknown (contig U4.4.85)                             | unknown                  | pattern-based | 363                      | 1              | -                                             | -         | -                |
| <b>SRR389187/</b><br><b>Aedes aegypti Aag2 cells + SINV-GFP</b>    | <i>Flaviviridae</i>   | <i>Cell fusing agent virus</i>                       | unknown                  | blastx        | 203                      | 47             | polyprotein [Cell fusing agent virus]         | 3,00E-11  | P33515.1         |
|                                                                    | <i>Birnaviridae</i>   | <i>Mosquitoe X virus</i>                             | unknown                  | blastx        | 87                       | 10             | putative VP1 [Mosquitoe x virus]              | 2,00E-10  | AFU34334.1       |
|                                                                    | <i>Togaviridae</i>    | <i>Sindbis virus</i>                                 | experimental infection   | blastx        | 1,874                    | 18             | polyprotein [Sindbis virus]                   | 0.0       | ACU25468.1       |
|                                                                    | <i>Parvoviridae</i>   | <i>Aedes aegypti densovirus 2</i>                    | unknown                  | blastx        | 52                       | 1              | Aedes aegypti densovirus 2                    | 5,00E-08  | NC_012636.1      |
|                                                                    | <i>Togaviridae</i>    | <i>Sindbis virus</i>                                 | experimental infection   | blastx        | 7,361                    | 2              | nonstructural polyprotein [Sindbis virus]     | 0.0       | AAA96974.1       |
| <b>SRR400496/</b><br><b>Aedes aegypti + SINV</b>                   | <i>Nodaviridae</i>    | <i>Mosquito nodavirus</i>                            | unknown                  | blastx        | 1,943                    | 2              | coat protein [Mosquito nodavirus MNV-1]       | 1,00E-161 | ACY74430.1       |
|                                                                    |                       | <i>Mosquito nodavirus (contig AaeS.82)</i>           | unknown                  | blastx        | 1,729*                   | 2              | p89 [Melon necrotic spot virus]               | 8,00E-09  | AGO36278.1       |
|                                                                    |                       | <i>Mosquito nodavirus (contig AaeS.83)</i>           | unknown                  | pattern-based | 709                      | 1              | -                                             | -         | -                |
| <b>SRR400497/</b><br><b>Aedes aegypti + SINV-B2</b>                | <i>Togaviridae</i>    | <i>Sindbis virus</i>                                 | experimental infection   | blastx        | 169                      | 65             | polyprotein [Sindbis virus]                   | 3,00E-32  | BAH70330.1       |
| <b>SRR1561607 /</b><br><b>Arabidopsis + TuMV</b>                   | <i>Potyviridae</i>    | <i>Turnip mosaic virus</i>                           | experimental infection   | blastn        | 7,771                    | 3              | polyprotein [Reporter vector pCBTuMV-GFP]     | 0         | ABK27329.1       |
| <b>SRR096455 /</b><br><b>Grouper GP cells +SGIV</b>                | <i>Iridoviridae</i>   | <i>Singapore grouper iridovirus</i>                  | experimental infection   | blastn        | 112                      | 22             | Singapore grouper iridovirus, complete genome | 1,00E-17  | AY521625.1       |
| <b>SRR452408 /</b><br><b>Mouse lungs + SARS-CoV</b>                | <i>Coronaviridae</i>  | <i>Severe acute respiratory syndrome coronavirus</i> | experimental infection   | blastn        | 335                      | 137            | SARS coronavirus, complete genome             | 8,00E-90  | JN854286.1       |
| <b>SRR640604 /</b><br><b>Mouse ES cells + EMCV</b>                 | <i>Picornaviridae</i> | <i>Encephalomyocarditis virus</i>                    | experimental infection   | blastn        | 243                      | 56             | Polyprotein [Encephalomyocarditis virus]      | 2E-49     | ACI47517.1       |

**Supplementary Table S4.** Reference viral sequences used for phylogenetic and dinucleotide frequency analyses.

| Family                                              | Genus                                  | Virus                                                             | Accession number<br>(Uniprot or GenBank)          |
|-----------------------------------------------------|----------------------------------------|-------------------------------------------------------------------|---------------------------------------------------|
| <b>Bunyaviridae</b>                                 | <i>Hantavirus</i>                      | <i>Hantaan virus (HanV)</i>                                       | P23456                                            |
|                                                     |                                        | <i>Seoul virus Hantavirus (SeV)</i>                               | P27314                                            |
|                                                     |                                        | <i>Tula virus (Tula)</i>                                          | AJ005637.1                                        |
|                                                     | <i>Nairovirus</i>                      | <i>Crimean-Congo hemorrhagic fever (CrCHFV)</i>                   | Q6TQR6                                            |
|                                                     |                                        | <i>Dugbe virus isolate ArD44313 (DuV)</i>                         | Q66431                                            |
|                                                     | <i>Orthobunyavirus</i>                 | <i>Bunyamwera virus (BunV)</i>                                    | P20470                                            |
|                                                     |                                        | <i>La crosse (LCV)</i>                                            | Q8JPR2                                            |
|                                                     | <i>Phlebovirus</i>                     | <i>Rift Valley fever virus (RVFV)</i>                             | P27316                                            |
|                                                     |                                        | <i>Uukuniemi virus (strain S23) (UkV)</i>                         | P33453                                            |
|                                                     | <i>Tospovirus</i>                      | <i>Tomato spotted (strain Brazilian Br-01)</i>                    | P28976                                            |
|                                                     |                                        | <i>Melon yellow spot virus (MYSV)</i>                             | AB061774.1                                        |
|                                                     |                                        | <i>Bean necrotic mosaic virus (BNMV)</i>                          | NC_018070.1                                       |
|                                                     | <i>Tenuivirus</i>                      | <i>Groundnut bud necrosis virus (GBNV)</i>                        | NC_003614.1                                       |
|                                                     |                                        | <i>Rice stripe virus (RSTV)</i>                                   | Q85431                                            |
|                                                     |                                        | <i>Rice grassy (RGTV)</i>                                         | NC_002323.1                                       |
| <i>Unclassified</i>                                 | <i>Phasi Charoen-like virus (PCLV)</i> | KM001085.1                                                        |                                                   |
| <b>Reoviridae</b>                                   | <i>Aquareovirus</i>                    | <i>Aquareovirus C (isolate Golden shiner/USA/GSRV/1977)</i>       | Q8JU61                                            |
|                                                     |                                        | <i>Aquareovirus G (isolate American grass carp/USA/PB01-155/)</i> | B2BNE0                                            |
|                                                     |                                        | <i>Aquareovirus A (isolate Chum salmon/Japan/CSRV/1981)</i>       | Q8VA42                                            |
|                                                     | <i>Coltivirus</i>                      | <i>Colorado tick fever virus (strain USA/Florio N-7180)</i>       | Q9DSQ0                                            |
|                                                     | <i>Cypovirus</i>                       | <i>Bombyx cypovirus 1 (BMCV)</i>                                  | AF323782.1                                        |
|                                                     | <i>Dinovernavirus</i>                  | <i>Aedes pseudoscutellaris reovirus (isolate France)</i>          | Q2Y0E9                                            |
|                                                     |                                        | <i>Fiji disease virus (Fijivirus)</i>                             | Q8JYK1                                            |
|                                                     | <i>Mycoreovirus</i>                    | <i>Nilaparvata lugens reovirus (NFV)</i>                          | NC_003654.1                                       |
|                                                     |                                        | <i>Cryphonectria parasitica mycoreovirus 1 (strain 9B21)</i>      | Q7TDB6                                            |
|                                                     | <i>Orthoreovirus</i>                   | <i>Reovirus type 1 (strain Lang)</i>                              | P0CK32                                            |
|                                                     |                                        | <i>Reovirus type 2 (strain D5/Jones)</i>                          | P17377                                            |
|                                                     |                                        | <i>Reovirus type 3 (strain Dearing)</i>                           | P0CK31                                            |
|                                                     | <i>Oryzavirus</i>                      | <i>Rice ragged stunt virus (isolate Thailand)</i>                 | O92604                                            |
|                                                     | <i>Cardoreovirus</i>                   | <i>Eriocheir sinensis reovirus (isolate China/905)</i>            | Q698V5                                            |
|                                                     | <i>Mimoreovirus</i>                    | <i>Micromonas pusilla reovirus (isolate Netherlands/2005)</i>     | Q110V0                                            |
|                                                     | <i>Orbivirus</i>                       | <i>Bluetongue virus 10</i>                                        | P13840                                            |
|                                                     | <i>Phytoreovirus</i>                   | <i>Rice gall dwarf virus (isolate Fujian)</i>                     | Q98631                                            |
|                                                     |                                        | <i>Rice dwarf virus (isolate Fujian)</i>                          | Q98631                                            |
|                                                     | <i>Rotavirus</i>                       | <i>Rotavirus A (isolate SI/South Africa/H96/58)</i>               | A2T3S0                                            |
|                                                     |                                        | <i>Rotavirus B (isolate novel adult diarrhea rotavirus-J19)</i>   | Q45UG0                                            |
|                                                     |                                        | <i>Rotavirus C (isolate Human/United Kingdom/Bristol/1989)</i>    | Q91E95                                            |
|                                                     | <i>Seadornavirus</i>                   | <i>Banna virus (strain Indonesia/JKT-6423/1980)</i>               | Q9INJ1                                            |
|                                                     | <b>Nodaviridae</b>                     | <i>Betanodavirus</i>                                              | <i>Striped jack nervous necrosis virus (STNV)</i> |
| <i>Tiger puffer nervous necrosis virus (TPNV)</i>   |                                        |                                                                   | NC_013460                                         |
| <i>Senegalese sole Iberian betanodavirus (SBIV)</i> |                                        |                                                                   | NC_024492.1                                       |
| <i>Alphanodavirus</i>                               |                                        | <i>Flock house virus (FHV)</i>                                    | Q66929                                            |
|                                                     |                                        | <i>Nodamura virus (NoV)</i>                                       | Q9IMM4                                            |
|                                                     |                                        | <i>Macrobrachium rosenbergii nodavirus (MrNV)</i>                 | Q6XNL5                                            |
|                                                     |                                        | <i>Penaeus vannamei nodavirus (PVNV)</i>                          | NC_014978.1                                       |
|                                                     |                                        | <i>Drosophila melanogaster American nodavirus (DmANV)</i>         | GQ342965.1                                        |
| <b>Unclassified</b>                                 | <i>Unassigned</i>                      | <i>Ixodes scapularis associated virus 2 (Ixodes2)</i>             | KM048319.1                                        |
|                                                     |                                        | <i>Ixodes scapularis associated virus 1 (Ixodes1)</i>             | KM048318.1                                        |
| <b>Luteoviridae</b>                                 | <i>Polerovirus</i>                     | <i>Potato leafroll virus (PLRV)</i>                               | KC456054.1                                        |
|                                                     |                                        | <i>Cucurbit aphid-borne yellows virus (CABYV)</i>                 | NC_003688.1                                       |
|                                                     | <i>Enamovirus</i>                      | <i>Pea enation mosaic virus-1 (strain WSG) (PEMV-1)</i>           | P29154                                            |
|                                                     |                                        | <i>Citrus vein enation virus (CEMV)</i>                           | YP_008130302.1                                    |
|                                                     | <i>Luteovirus</i>                      | <i>Bean leafroll virus</i>                                        | AAL66233.1                                        |
|                                                     |                                        | <i>Barley yellow dwarf virus (isolate PAV) (BYDV)</i>             | P09505                                            |
|                                                     | <i>Sobemovirus</i>                     | <i>Soybean yellow common mosaic virus (SYCV)</i>                  | AEO16607                                          |
|                                                     |                                        | <i>Sesbania mosaic virus (SMV)</i>                                | YP_007697678                                      |
|                                                     | <i>Tombusviridae</i>                   | <i>Carnation mottle virus (CARMV)</i>                             | NC_001265.2                                       |
|                                                     |                                        | <i>Melon necrotic spot virus (MNSV)</i>                           | AB232925.1                                        |
| <i>Tobacco necrosis virus (TNV)</i>                 |                                        | M33002.1                                                          |                                                   |

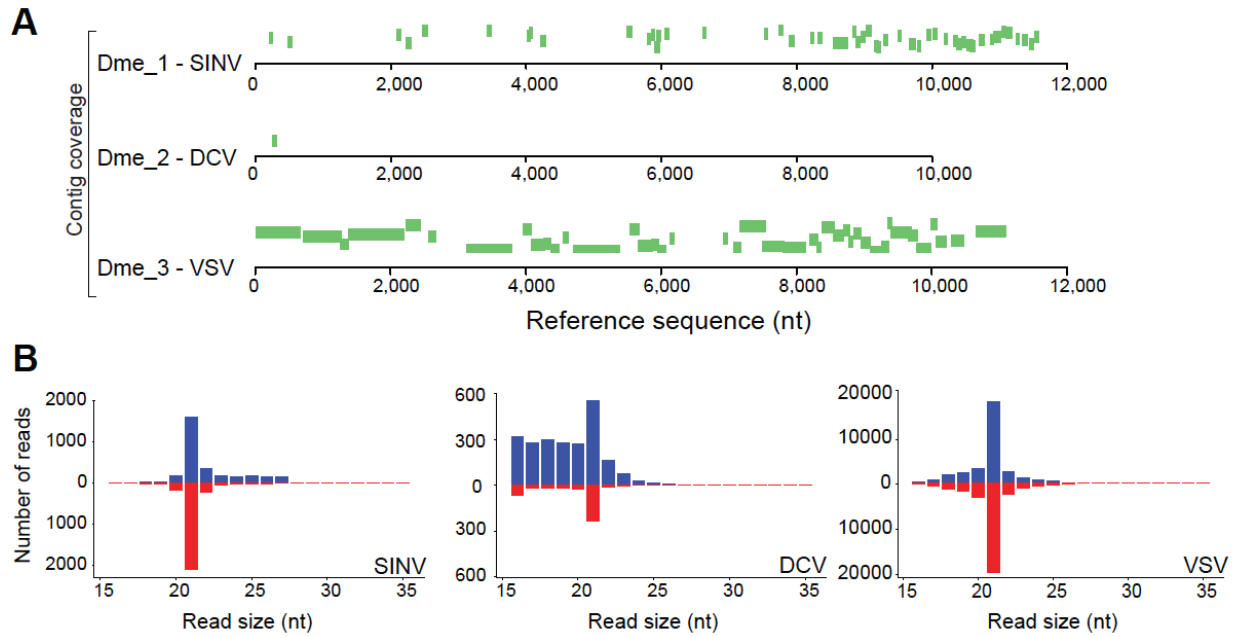

**Supplementary Figure S1.** Virus-derived small RNA can be assembled into long contig sequences. **(A)** Distribution of contigs assembled using our small RNA metagenomics strategy along the reference genomes of DCV, VSV and SINV. **(B)** Small RNA size profile of DCV, VSV and SINV utilized for laboratory infections in *Drosophila*.

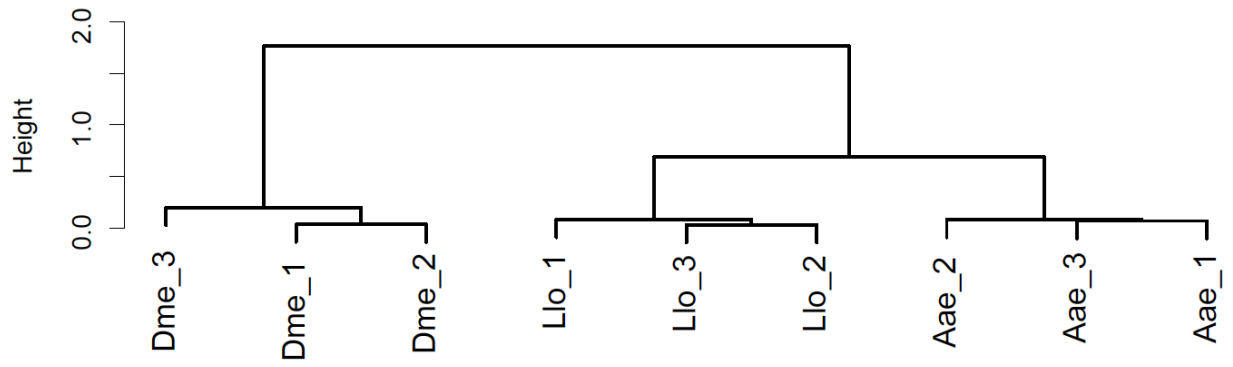

**Supplementary Figure S2.** Unknown contigs classify small RNA libraries in a host-specific manner. Clustering of libraries based on sequence similarity of unknown contigs is able to group libraries based on insect species. Contig clustering by similarity was performed using the BLASTClust program within the standalone BLAST package, requiring 50% of length with at least 50% of identity between contigs.



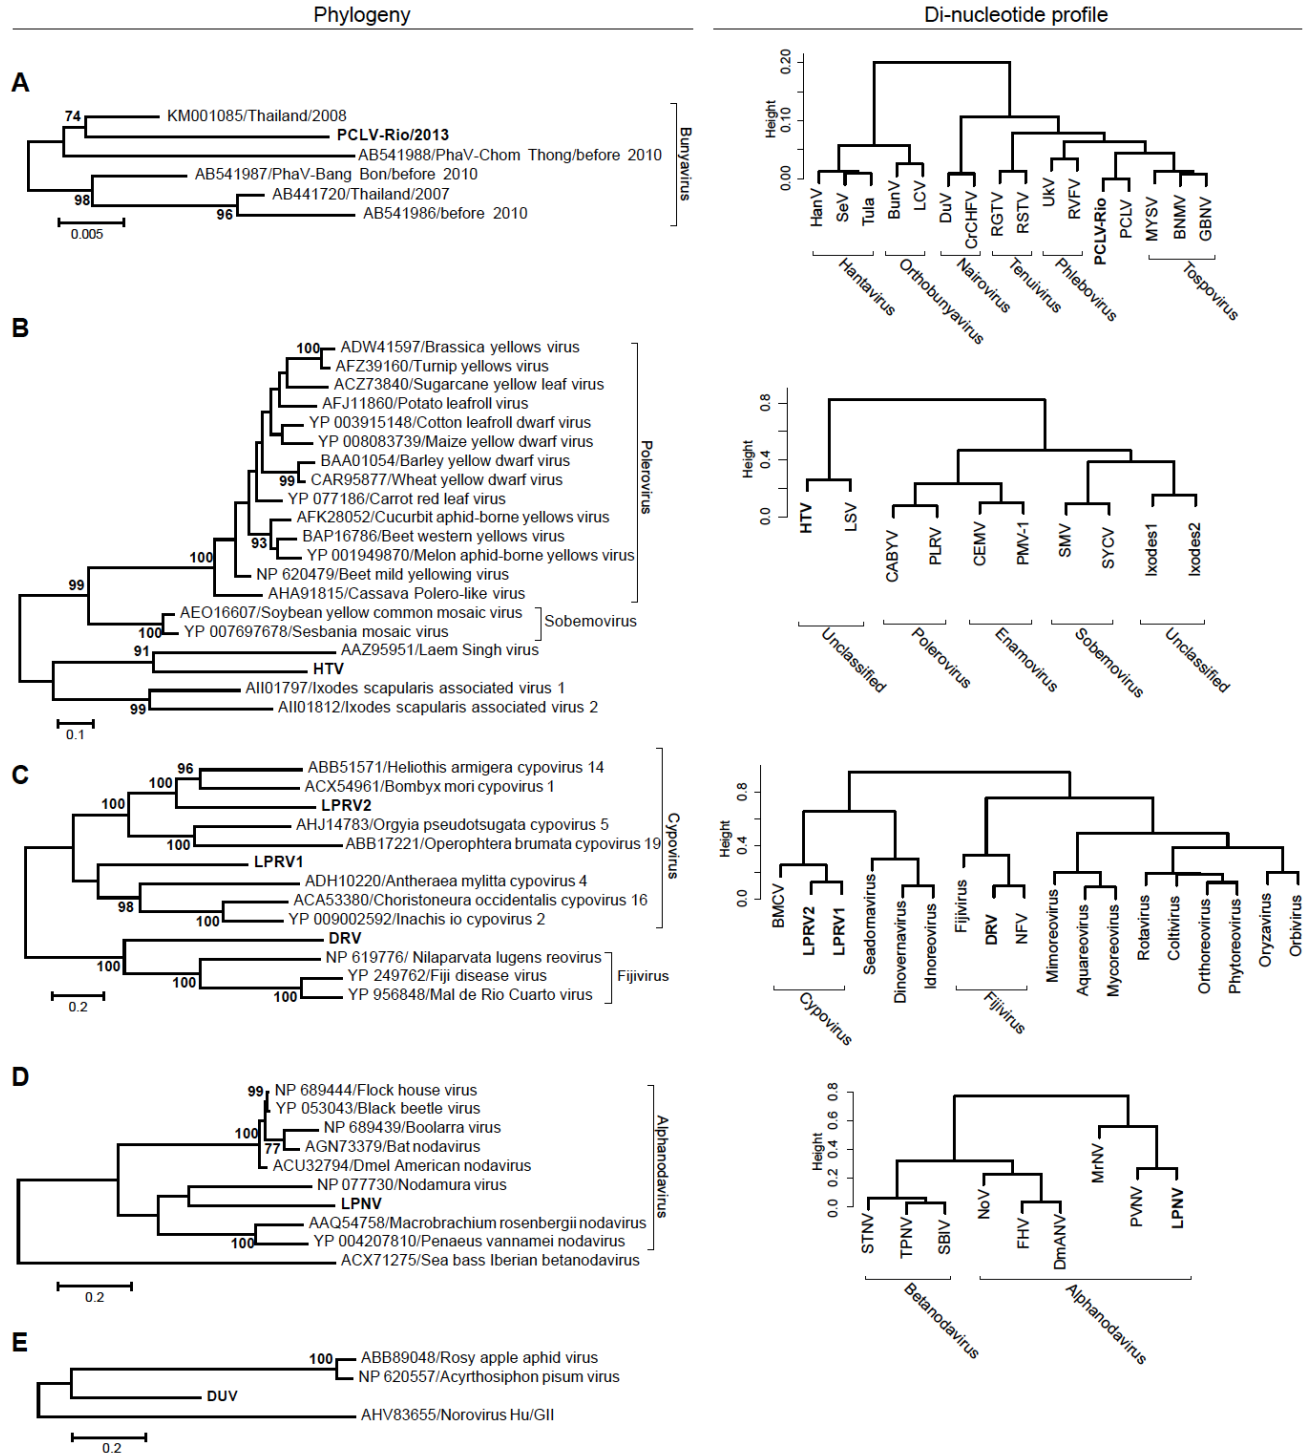

**Supplementary Figure S3.** Viruses identified by small RNA sequencing belong to diverse viral families. **(A)** PCLV in mosquitoes from Rio de Janeiro, Brazil clusters with other viral strains from Thailand on the phylogenetic tree with 74% bootstrap confidence at  $p$ -distance of 0.038. The dinucleotide profile reinforces the relationship between Rio and Asian strains of PCLV. **(B)** HTV also identified in mosquitoes

clusters with the unclassified *Laem Singh virus* (LSV) (also its top BLASTP hit) at 91% bootstrap confidence. The p-distance between HTV virus and *Laem Singh virus* is 0.57. The unclassified *Ixodes scapularis-associated viruses* 1 and 2 are the next nearest neighbours at p-distances of 0.68. The p-distances to the genera *Sobemovirus* and *Polerovirus* range from 0.72 to 0.77. Assignment of HTV virus to a genus is not possible, although we tentatively assign it to the *Luteoviridae* family. Dinucleotide analysis also clusters HTV and LSV together separate from other characterized viruses. (C) Two sandfly reoviruses, LPRV1 and LPRV2, cluster within the genus *Cypovirus*, whereas the reovirus from fruit flies, DRV, appears as an outlier on the genus *Fijivirus*. We assign all three viruses to the family *Reoviridae*, sub-family *Spinareovirinae*. LPRV1 and LPRV2 have p-distances of 0.67 and 0.60 respectively to their nearest cypoviruses. The p-distance from DRV to the nearest Fijivirus is 0.75, and its p-distances to the cypoviruses range from 0.82 to 0.84. Dinucleotide analysis of reoviruses reinforces the classification suggested by phylogeny. (D) The sandfly virus, LPNV, clusters within the genus *Alphanodavirus* genus in the family *Nodaviridae*. The p-distance from LPNV to its top BLASTP hit, *Nodamura virus*, is 0.51, and its p-distances to the other members of genus *Alphanodavirus* range from 0.50 to 0.57. Its p-distance to the *Betanodavirus* outgroup sequence is 0.73. p-distances from the other members of genus *Alphanodaviruses* in the tree to the *Betanodavirus* outgroup are in the range 0.73 to 0.76. There is no bootstrap support for definition of a nearest neighbor for LPNV. Dinucleotide analysis reinforces the classification of LPNV within genus *Alphanodavirus*. (E) *Norovirus* is used as an outgroup as it has the third-best (but very poor) BLASTP hit to DUV found in fruit flies. The p-distance from DUV to both *Rosy apple aphid virus* and *Acyrtosiphon pisum virus* is 0.72. Both of these viruses are taxonomically unclassified and therefore no family assignment can be made for DUV.

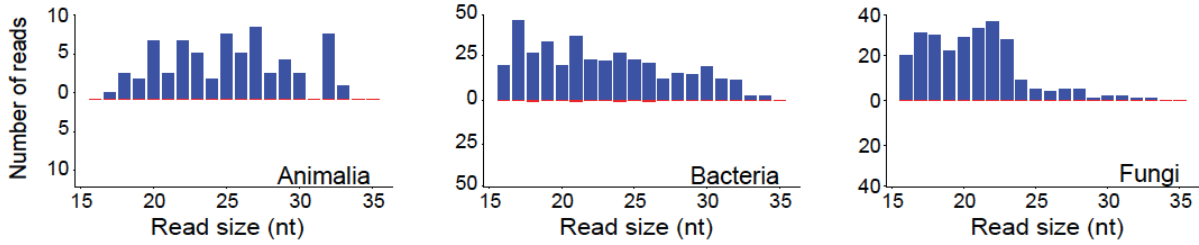

**Supplementary Figure S4.** Small RNA size profile of representative contigs derived from animal, bacterial and fungal sequences. The small RNA size profile of representative non-viral contigs derived from different taxa are shown. Blue and red represent small RNAs in positive and negative strands, respectively.

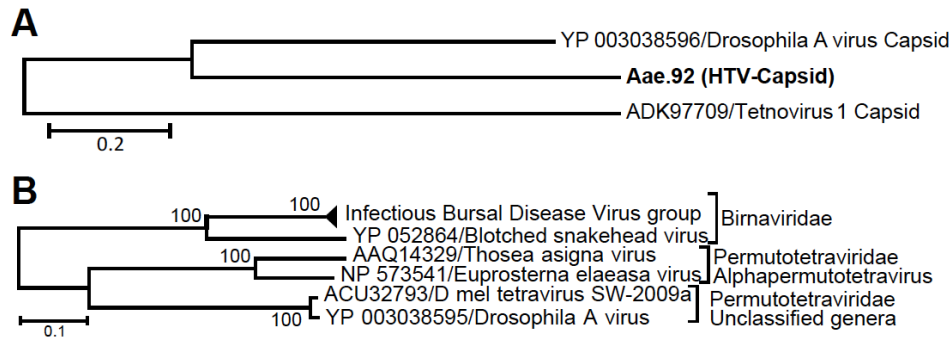

**Supplementary Figure S5.** Polymerase and capsid segments from HTV and DAV show similarity to different viral families. **(A)** Phylogenetic analysis of the HTV capsid and best BLASTP hits suggests it is more similar to DAV while HTV RdRP is most similar to other uncharacterized viruses and the *Luteoviridae* family (**Supplementary Figure S3B**). *Tetnovirus 1* is used as an outgroup as it has the third-best (but very poor) BLASTP hit to HTV capsid. **(B)** Phylogenetic analysis of the DAV RdRP and best BLASTP hits suggests it is more similar to viruses from the family *Permutotetraviridae*, 100% bootstrap at *p*-distance of 0.0009 to *Drosophila melanogaster tetravirus*,.

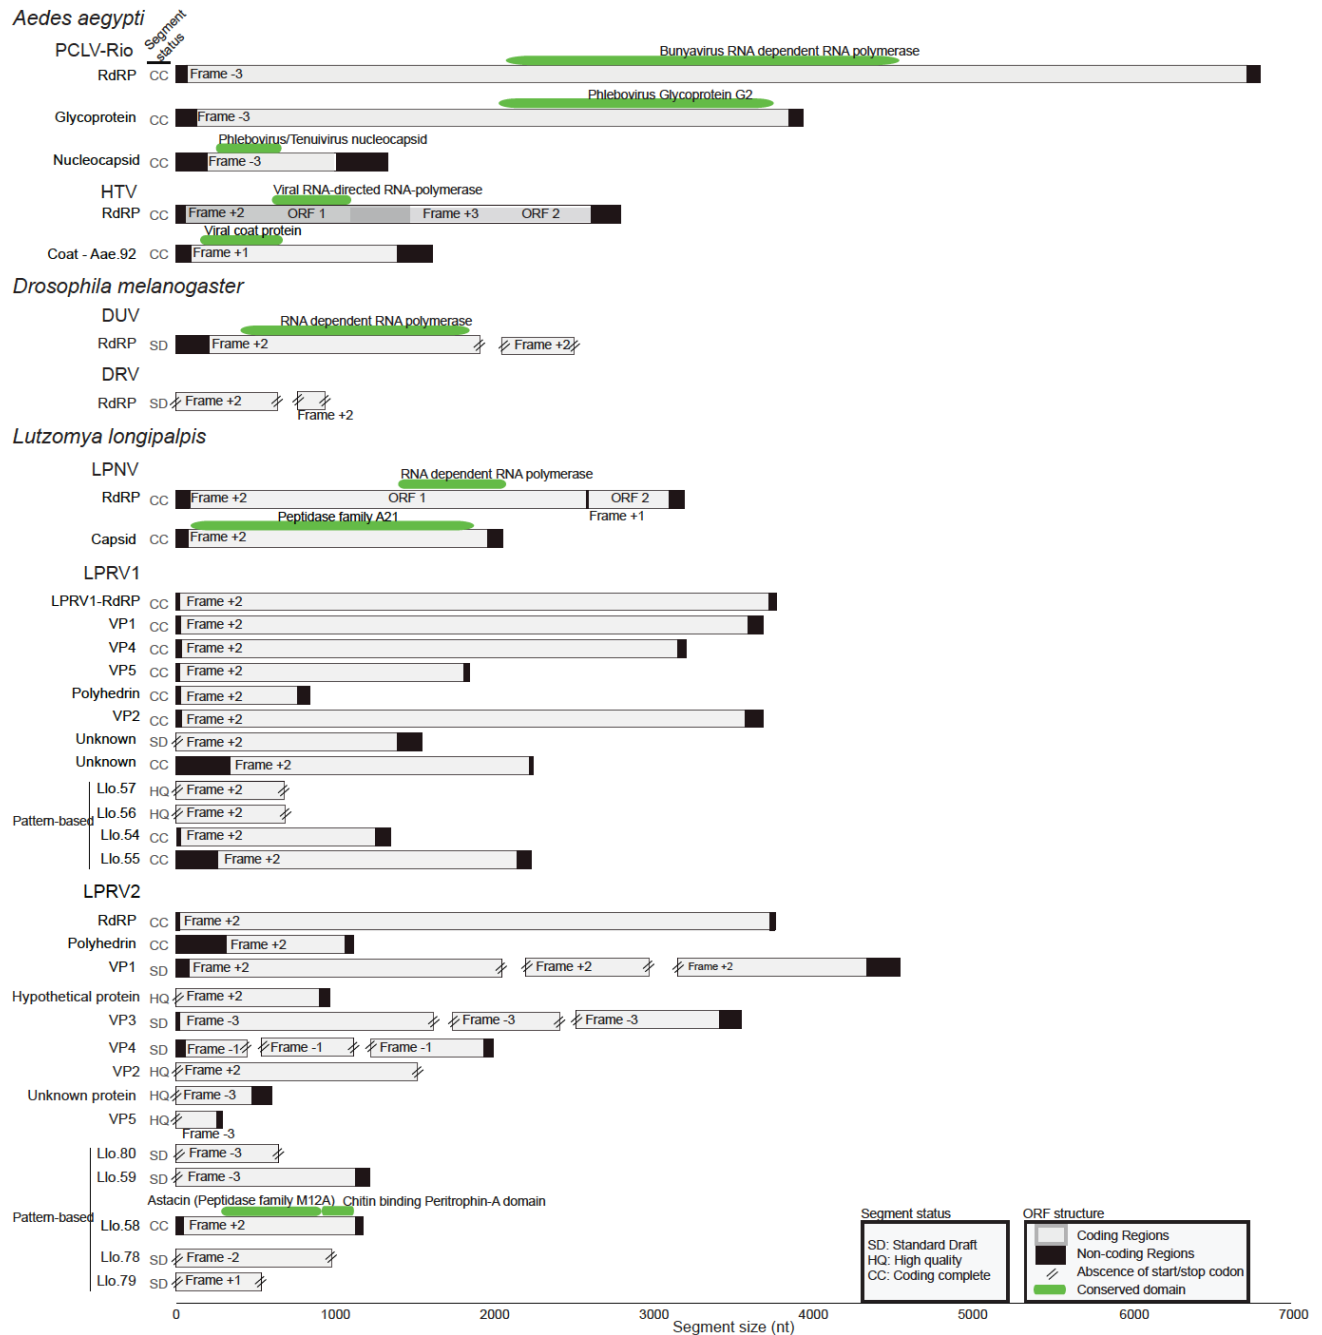

**Supplementary Figure S6.** ORF organization and domain analysis of viral sequences identified by our strategy. Viral contigs are shown in the same scale highlighting predicted ORFs and conserved protein domains. The status of the virus sequence relative to the expected complete genome and presence of start/stop codons are shown. Annotation status of novel viral sequences followed the guidelines previously described by Ladner et al (39).

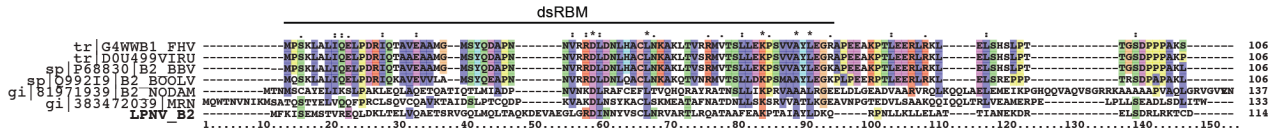

**Supplementary Figure S7.** Analysis of B2-like protein from LPNV. Protein sequence alignment between a putative protein encoded by RNA 1 of LPNV and other B2 proteins derived from Alphanodaviruses. Despite high conservation, protein alignment of suggests the LPNV B2-like protein lacks several conserved residues within the putative dsRNA Binding Motif (dsRBM).

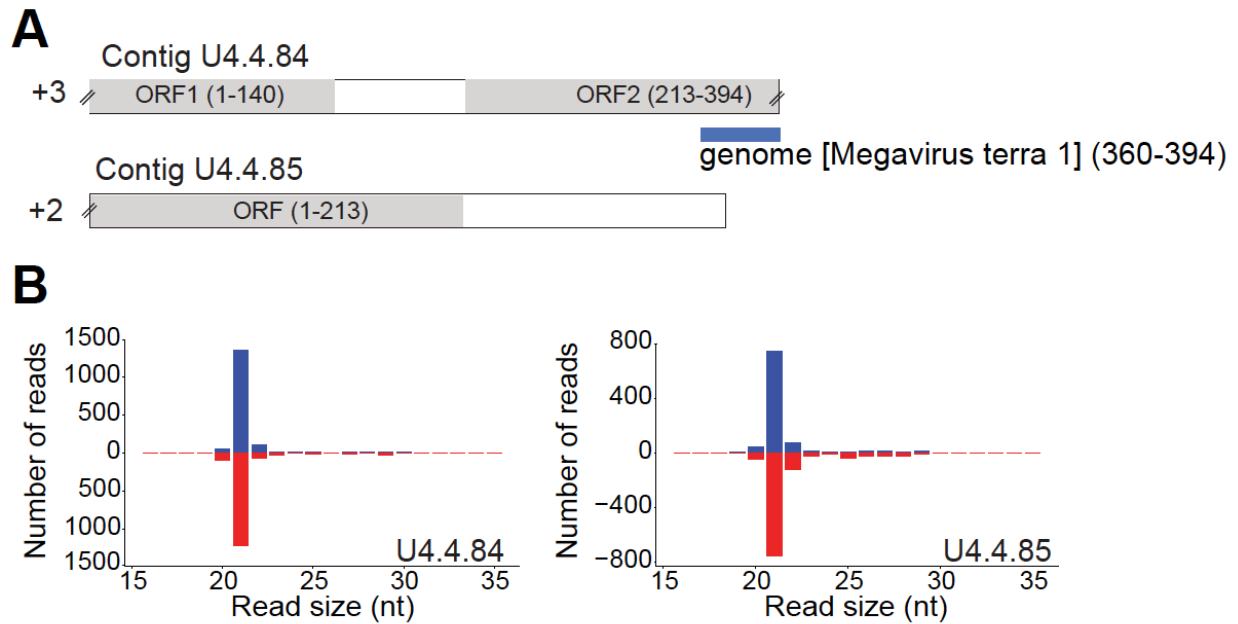

**Supplementary Figure S8.** ORF structure and small RNA profile of unknown viral sequences identified in small RNA libraries from U4.4 cells. **(A)** Contigs U4.4.84 and U4.4.85 have incomplete ORFs with no conserved domains. The second incomplete ORF of contig U4.4.84 shows similarity to *Megavirus terra 1*. **(B)** Small RNAs with a canonical siRNA profile mapping to contigs U4.4.84 and U4.4.85 are also found in libraries from Aag2 cells prepared in the same laboratory.

## SUPPLEMENTARY REFERENCES

62. Edgar, R.C. (2004) MUSCLE: multiple sequence alignment with high accuracy and high throughput. *Nucleic acids research*, **32**, 1792-1797.
63. Tamura, K., Stecher, G., Peterson, D., Filipski, A. and Kumar, S. (2013) MEGA6: Molecular Evolutionary Genetics Analysis version 6.0. *Molecular biology and evolution*, **30**, 2725-2729.
64. Tamura, K. (1992) Estimation of the number of nucleotide substitutions when there are strong transition-transversion and G+C-content biases. *Molecular biology and evolution*, **9**, 678-687.
65. Whelan, S. and Goldman, N. (2001) A general empirical model of protein evolution derived from multiple protein families using a maximum-likelihood approach. *Molecular biology and evolution*, **18**, 691-699.
66. Zuckerkandl, E. and Pauling, L. (1965) Molecules as documents of evolutionary history. *Journal of theoretical biology*, **8**, 357-366.
67. Lobo, F.P., Mota, B.E., Pena, S.D., Azevedo, V., Macedo, A.M., Tauch, A., Machado, C.R. and Franco, G.R. (2009) Virus-host coevolution: common patterns of nucleotide motif usage in Flaviviridae and their hosts. *PloS one*, **4**, e6282.
